# Supplementary material
Source: PubMed Central journal article supplement (PMC6625631)
Supplement: CJN.11801018SupplementaryData.pdf [file CJN.11801018SupplementaryData.pdf]

## **SUPPLEMENTAL MATERIAL**

### **Contents**

1. Treatment protocol
2. Supplemental table 1. Inclusion sites
3. Supplemental table 2. Malignancies during follow-up

#### **1. Treatment protocol**

Group A received induction treatment with oral cyclophosphamide 2 mg/kg/d (age >65 1.5 mg/kg/d) for 6 months. Group B received induction treatment with MMF 1000 mg twice daily for 6 months. Both treatment groups received prednisolone in a tapering regime during induction treatment. All patients received initially prednisolone 1 mg/kg/d (max 60 mg) until six weeks after start of treatment. Thereafter, prednisolone was tapered with 10 mg every two weeks until a daily dose of 30 mg/d, subsequently with 5 mg every two week until 15 mg daily and with 2.5 mg every four weeks until discontinuation of prednisolone. With this regimen, by 6 months prednisolone should be 10 mg daily and should be discontinued by 9,5 months after study entry.

All patients were switched to maintenance therapy with azathioprine 1.5 mg/kg/d after six months, provided that the patient was in stable remission for at least three months. If not, switch of therapy could be postponed to a maximum of nine months after start of therapy. When remission was not attained within 6 months, therapy was considered to have failed. Azathioprine maintenance therapy was tapered after 12 months and completely withdrawn 2 years after study entry.

If the following events occurred, dosages had to be adjusted as it follows: leukocytopenia ( $<4,0 \times 10^9/L$ ) prompted for a 25% reduction of cyclophosphamide, MMF and azathioprine; if the leukocyte count dropped below  $3.0 \times 10^9/L$ , medication had to be stopped temporarily until leukocyte counts normalized, and treatment had to be resumed with at least 25% decrease.

*Supplemental material is neither peer-reviewed nor thoroughly edited by CJASN. The authors alone are responsible for the accuracy and presentation of the material.*

The treatment protocol was stopped after 4 years of follow-up, or if remission was not achieved within 6 months, a relapse developed, the patient experienced unacceptable side-effects or withdrawal of informed consent.

#### *Concomitant medication*

Both groups received additional therapy, entailing prophylaxis against *Pneumocystis pneumonia* (co-trimoxazole for 6 months), osteoporosis prophylaxis, candida prophylaxis (until prednisolone dose reached  $\leq 15$  mg/day), and prophylaxis of dyspeptic symptoms (as required).

*Supplemental material is neither peer-reviewed nor thoroughly edited by CJASN. The authors alone are responsible for the accuracy and presentation of the material.*

2. Supplemental table 1. Inclusion sites.

| <b>Inclusion site</b>                | <b>Number of included patients</b> |
|--------------------------------------|------------------------------------|
| University Medical Center Groningen  | 47                                 |
| Maastricht University Medical Center | 20                                 |
| Medisch Centrum Leeuwarden           | 11                                 |
| Scheper Ziekenhuis Emmen             | 2                                  |
| Ziekenhuis St Jansdal Hardenberg     | 2                                  |
| Isala Zwolle                         | 1                                  |
| Erasmus MC                           | 1                                  |

3. Supplemental table 2. Malignancies during study follow-up.

| Malignancy during study   | Time after study entry diagnosed | Previous treatment                               | Outcome, last information (date)                           |
|---------------------------|----------------------------------|--------------------------------------------------|------------------------------------------------------------|
| <b>Randomization: CYC</b> |                                  |                                                  |                                                            |
| Pancreas carcinoma        | 4 months                         | Diagnosis: CYC and CS induction, AZA maintenance | Died                                                       |
| Esophagus carcinoma       | 2 months                         | Diagnosis: CYC and CS, 1 relapse: CYC and CS     | Treatment: surgery, recovered without sequelae (6-10-2016) |
| Bladder carcinoma         | 33 months                        | Diagnosis: CYC and CS                            | Recovered without sequelae (July 2016)                     |
| <b>Randomization: MMF</b> |                                  |                                                  |                                                            |
| Lung carcinoma            | 12 months                        | Diagnosis: CYC and CS; First relapse: CYC and CS | Died                                                       |
| Squamous cell carcinoma   | 49 months                        | Diagnosis: CYC and CS; First relapse: CYC and CS | Recovered without sequelae                                 |
| Melanoma                  | 6 months                         | Unknown                                          | Alive 9 years after inclusion                              |

*Supplemental material is neither peer-reviewed nor thoroughly edited by CJASN. The authors alone are responsible for the accuracy and presentation of the material.*
